# Supplementary material for: Shifting attributions for poverty motivates opposition to inequality and enhances egalitarianism
Source: Springer Nature journal article supplement (doi:10.1038/s41562-020-0835-8), 2020-03-16
Supplement: 41562_2020_835_MOESM2_ESM.pdf [file 41562_2020_835_MOESM2_ESM.pdf]

## Reporting Summary

Nature Research wishes to improve the reproducibility of the work that we publish. This form provides structure for consistency and transparency in reporting. For further information on Nature Research policies, see [Authors & Referees](#) and the [Editorial Policy Checklist](#).

### Statistics

For all statistical analyses, confirm that the following items are present in the figure legend, table legend, main text, or Methods section.

n/a Confirmed

- ☐ ☒ The exact sample size ( $n$ ) for each experimental group/condition, given as a discrete number and unit of measurement
- ☐ ☒ A statement on whether measurements were taken from distinct samples or whether the same sample was measured repeatedly
- ☐ ☒ The statistical test(s) used AND whether they are one- or two-sided  
*Only common tests should be described solely by name; describe more complex techniques in the Methods section.*
- ☐ ☒ A description of all covariates tested
- ☐ ☒ A description of any assumptions or corrections, such as tests of normality and adjustment for multiple comparisons
- ☐ ☒ A full description of the statistical parameters including central tendency (e.g. means) or other basic estimates (e.g. regression coefficient) AND variation (e.g. standard deviation) or associated estimates of uncertainty (e.g. confidence intervals)
- ☐ ☒ For null hypothesis testing, the test statistic (e.g.  $F$ ,  $t$ ,  $r$ ) with confidence intervals, effect sizes, degrees of freedom and  $P$  value noted  
*Give  $P$  values as exact values whenever suitable.*
- ☒ ☐ For Bayesian analysis, information on the choice of priors and Markov chain Monte Carlo settings
- ☐ ☒ For hierarchical and complex designs, identification of the appropriate level for tests and full reporting of outcomes
- ☐ ☒ Estimates of effect sizes (e.g. Cohen's  $d$ , Pearson's  $r$ ), indicating how they were calculated

*Our web collection on [statistics for biologists](#) contains articles on many of the points above.*

### Software and code

Policy information about [availability of computer code](#)

Data collection

no software was used

Data analysis

All statistical analyses in Studies 1, 2, 4a, and 4b were conducted using the R programming language and built in packages (R Core Team, 2016) and the R Studio user interface (RStudio Team, 2015). We utilized various additional packages to conduct the following analyses: We computed descriptive statistics using psych (Revelle, 2017), multilevel models using nlme (Pinheiro, Bates, DebRoy, Sarkar, & R Core Team, 2018), effect sizes using effsize (Torchiiano, 2016), power analyses using pwr (Champely, 2018), and path analyses using lavaan (Rosseel, 2012).

All statistical analyses in Study 3 was conducted using Stata 14.2.

All code available via <https://osf.io/26aw3/>

For manuscripts utilizing custom algorithms or software that are central to the research but not yet described in published literature, software must be made available to editors/reviewers. We strongly encourage code deposition in a community repository (e.g. GitHub). See the Nature Research [guidelines for submitting code & software](#) for further information.

### Data

Policy information about [availability of data](#)

All manuscripts must include a [data availability statement](#). This statement should provide the following information, where applicable:

- Accession codes, unique identifiers, or web links for publicly available datasets
- A list of figures that have associated raw data
- A description of any restrictions on data availability

All data have been made available via links provided in the manuscript

## Field-specific reporting

Please select the one below that is the best fit for your research. If you are not sure, read the appropriate sections before making your selection.

☐ Life sciences ☒ Behavioural & social sciences ☐ Ecological, evolutionary & environmental sciences

For a reference copy of the document with all sections, see [nature.com/documents/nr-reporting-summary-flat.pdf](https://www.nature.com/documents/nr-reporting-summary-flat.pdf)

## Behavioural & social sciences study design

All studies must disclose on these points even when the disclosure is negative.

|                   |                                                                                                                                                                                                                                                                                                |
|-------------------|------------------------------------------------------------------------------------------------------------------------------------------------------------------------------------------------------------------------------------------------------------------------------------------------|
| Study description | five studies, all quantitative                                                                                                                                                                                                                                                                 |
| Research sample   | samples vary from representative and cross-national samples (studies 1 and 2) to university samples and online adult samples                                                                                                                                                                   |
| Sampling strategy | sampling strategy outlined in main text - convenience samples were used with the exception of Study 1 and 2 (representative samples through World Values Survey and Turkprime Panel Services, respectively)                                                                                    |
| Data collection   | computers were used to gather data, researchers were blind to all hypotheses and conditions                                                                                                                                                                                                    |
| Timing            | Study 1: There is no start and stop date given archival data<br>Study 2: Collected July 23rd, 2019<br>Study 3: Collected December 22nd, 2017 to January 12th, 2018<br>Study 4a - Data Collection ran January 2017 to April 2017<br>Study 4b - Data Collection ran September 2017 to April 2018 |
| Data exclusions   | all exclusions described in main text                                                                                                                                                                                                                                                          |
| Non-participation | all instances of non-participation are described in main text                                                                                                                                                                                                                                  |
| Randomization     | participants were randomly assigned to experimental condition using a computer algorithm                                                                                                                                                                                                       |

## Reporting for specific materials, systems and methods

We require information from authors about some types of materials, experimental systems and methods used in many studies. Here, indicate whether each material, system or method listed is relevant to your study. If you are not sure if a list item applies to your research, read the appropriate section before selecting a response.

### Materials & experimental systems

| n/a                                 | Involved in the study                                           |
|-------------------------------------|-----------------------------------------------------------------|
| <input checked="" type="checkbox"/> | <input type="checkbox"/> Antibodies                             |
| <input checked="" type="checkbox"/> | <input type="checkbox"/> Eukaryotic cell lines                  |
| <input checked="" type="checkbox"/> | <input type="checkbox"/> Palaeontology                          |
| <input checked="" type="checkbox"/> | <input type="checkbox"/> Animals and other organisms            |
| <input type="checkbox"/>            | <input checked="" type="checkbox"/> Human research participants |
| <input checked="" type="checkbox"/> | <input type="checkbox"/> Clinical data                          |

### Methods

| n/a                                 | Involved in the study                           |
|-------------------------------------|-------------------------------------------------|
| <input checked="" type="checkbox"/> | <input type="checkbox"/> ChIP-seq               |
| <input checked="" type="checkbox"/> | <input type="checkbox"/> Flow cytometry         |
| <input checked="" type="checkbox"/> | <input type="checkbox"/> MRI-based neuroimaging |

## Human research participants

Policy information about [studies involving human research participants](#)

|                            |                                                                                                                                                                                                                                                                                                                                                                                                                                                                                                                                           |
|----------------------------|-------------------------------------------------------------------------------------------------------------------------------------------------------------------------------------------------------------------------------------------------------------------------------------------------------------------------------------------------------------------------------------------------------------------------------------------------------------------------------------------------------------------------------------------|
| Population characteristics | See above.                                                                                                                                                                                                                                                                                                                                                                                                                                                                                                                                |
| Recruitment                | Study 1 was archival data, thus there was no participant recruitment. Participants in Study 2 were recruited via TurkPrime panel services. Participants in Study 3 were recruited on Amazon's Mechanical Turk. Participants in Studies 4a and 4b were recruited via the psychology student participant pool at a Western Canadian University. There were no opportunities to introduce self-selection or other biases as Studies 1 and 2 were correlation and Studies 3 through 4b utilized random assignment and hypothesis concealment. |
| Ethics oversight           | Study 1 reports analyses from two publicly available data sets that are not individually identifiable, rendering it exempt from IRB review. Study 2 was approved by the Institutional Review Board (IRB) at University of British Columbia, Study 3 was approved by the IRB at University of California, Irvine, and Studies 4a and 4b were approved by the IRB at Simon Fraser University.                                                                                                                                               |

Note that full information on the approval of the study protocol must also be provided in the manuscript.
